# Supplementary material for: Proteolytic processing of QSOX1A ensures efficient secretion of a potent disulfide catalyst
Source: PubMed Central journal article supplement (PMC3749868; doi:10.1042/bj20130360), 2013-08-09
Supplement: bj4540181add.pdf [file bj4540181add.pdf]

## SUPPLEMENTARY ONLINE DATA

# Proteolytic processing of QSOX1A ensures efficient secretion of a potent disulfide catalyst

 Jana RUDOLF\*, Marie A. PRINGLE\* and Neil J. BULLEID\*<sup>1</sup>

\*Institute of Molecular, Cellular and Systems Biology, College of Medical Veterinary and Life Sciences, Davidson Building, University of Glasgow, Glasgow G12 8QQ, U.K.

**Table S1 Human proteases present in the ER and Golgi**

 Results were returned upon a Uniprot database (<http://www.uniprot.org>) enquiry using the following search terms: Human/Protease/Golgi Stack [OR] Human/Protease/Endoplasmic Reticulum. Proprotein convertases are highlighted in bold.

| Entry         | Gene name           | Protein names                                                                                                       |
|---------------|---------------------|---------------------------------------------------------------------------------------------------------------------|
| P56817        | <i>BACE1</i>        | $\beta$ -Secretase 1 (membrane-associated aspartic protease 2)                                                      |
| Q9Y5Z0        | <i>BACE2</i>        | $\beta$ -Secretase 2 (membrane-associated aspartic protease 1)                                                      |
| A6NHC0        | <i>CAN8</i>         | Calpain-8                                                                                                           |
| Q9Y646        | <i>CBPQ</i>         | Carboxypeptidase Q (plasma glutamate carboxypeptidase)                                                              |
| Q60344        | <i>ECE2</i>         | Endothelin-converting enzyme 2                                                                                      |
| Q9NZ08        | <i>ERAP1</i>        | Endoplasmic reticulum aminopeptidase 1 (type 1 tumour necrosis factor receptor shedding aminopeptidase regulator)   |
| Q6P179        | <i>ERAP2</i>        | Endoplasmic reticulum aminopeptidase 2                                                                              |
| Q7Z2K6        | <i>ERMP1</i>        | Endoplasmic reticulum metalloproteinase 1                                                                           |
| Q75844        | <i>FACE1</i>        | CAAX prenyl protease 1 homologue (farnesylated protein-converting enzyme 1, zinc metalloproteinase Ste24 homologue) |
| <b>P09958</b> | <b><i>FURIN</i></b> | <b>Furin (paired basic amino acid residue-cleaving enzyme, PACE)</b>                                                |
| Q92643        | <i>GPI8</i>         | GPI (glycosylphosphatidylinositol)-anchor transamidase                                                              |
| Q8TCT9        | <i>HM13</i>         | Minor histocompatibility antigen H13 (intramembrane protease 1, signal peptide peptidase)                           |
| Q92876        | <i>KLK6</i>         | Kallikrein-6                                                                                                        |
| Q14703        | <i>MBTP1</i>        | Membrane-bound transcription factor site-1 protease (subtilisin/kexin isoenzyme 1, SKI-1)                           |
| Q75900        | <i>MMP23</i>        | Matrix metalloproteinase-23                                                                                         |
| <b>P29122</b> | <b><i>PCSK6</i></b> | <b>Proprotein convertase subtilisin/kexin type 6 (paired basic amino acid cleaving enzyme 4, PACE4)</b>             |
| <b>Q16549</b> | <b><i>PCSK7</i></b> | <b>Proprotein convertase subtilisin/kexin type 7 (proprotein convertase 7, PC7; proprotein convertase 8, PC8)</b>   |
| P49768        | <i>PSN1</i>         | Presenilin-1 (PS-1)                                                                                                 |
| P49810        | <i>PSN2</i>         | Presenilin-2 (PS-2)                                                                                                 |
| P67812        | <i>SC11A</i>        | Signal peptidase complex catalytic subunit SEC11A                                                                   |
| Q9BY50        | <i>SC11C</i>        | Signal peptidase complex catalytic subunit SEC11C                                                                   |
| Q9Y6A9        | <i>SPCS1</i>        | Signal peptidase complex subunit 1 (12 kDa subunit)                                                                 |
| Q15005        | <i>SPCS2</i>        | Signal peptidase complex subunit 2 (25 kDa subunit)                                                                 |
| P61009        | <i>SPCS3</i>        | Signal peptidase complex subunit 3 (22/23 kDa subunit)                                                              |
| Q8TCT7        | <i>SPP2B</i>        | Signal peptide peptidase-like 2B (intramembrane protease 4)                                                         |
| Q8IUH8        | <i>SPP2C</i>        | Signal peptide peptidase-like 2C intramembrane protease 5)                                                          |
| Q8TCT6        | <i>SPPL3</i>        | Signal peptide peptidase-like 3 (intramembrane protease 2)                                                          |
| P57727        | <i>TMPS3</i>        | Transmembrane protease serine 3                                                                                     |
| Q9UI38        | <i>TSP50</i>        | Probable threonine protease PRSS50 (testis-specific)                                                                |
| Q94966        | <i>UBP19</i>        | Ubiquitin C-terminal hydrolase 19                                                                                   |
| Q8NFA0        | <i>UBP32</i>        | Ubiquitin C-terminal hydrolase 32                                                                                   |
| P09936        | <i>UCHL1</i>        | Ubiquitin C-terminal hydrolase isoenzyme L1                                                                         |
| Q9NUQ7        | <i>UFSP2</i>        | Ufm1-specific protease 2                                                                                            |
| Q96JH7        | <i>VCIP1</i>        | Deubiquitinating protein VCIP135                                                                                    |

Received 13 March 2013/23 May 2013; accepted 28 May 2013

Published as BJ Immediate Publication 28 May 2013, doi:10.1042/BJ20130360

<sup>1</sup> To whom correspondence should be addressed (email [neil.bulleid@glasgow.ac.uk](mailto:neil.bulleid@glasgow.ac.uk)).
